# Supplementary material for: Distinct kinetic and mechanical properties govern mucin 16- and podocalyxin-mediated tumor cell adhesion to E- and L-selectin in shear flow
Source: PubMed Central journal article supplement (PMC4694797; doi:10.18632/oncotarget.4704), 2015-07-28
Supplement: oncotarget-06-24842-s001.pdf [file oncotarget-06-24842-s001.pdf]

## SUPPLEMENTARY FIGURES AND TABLES

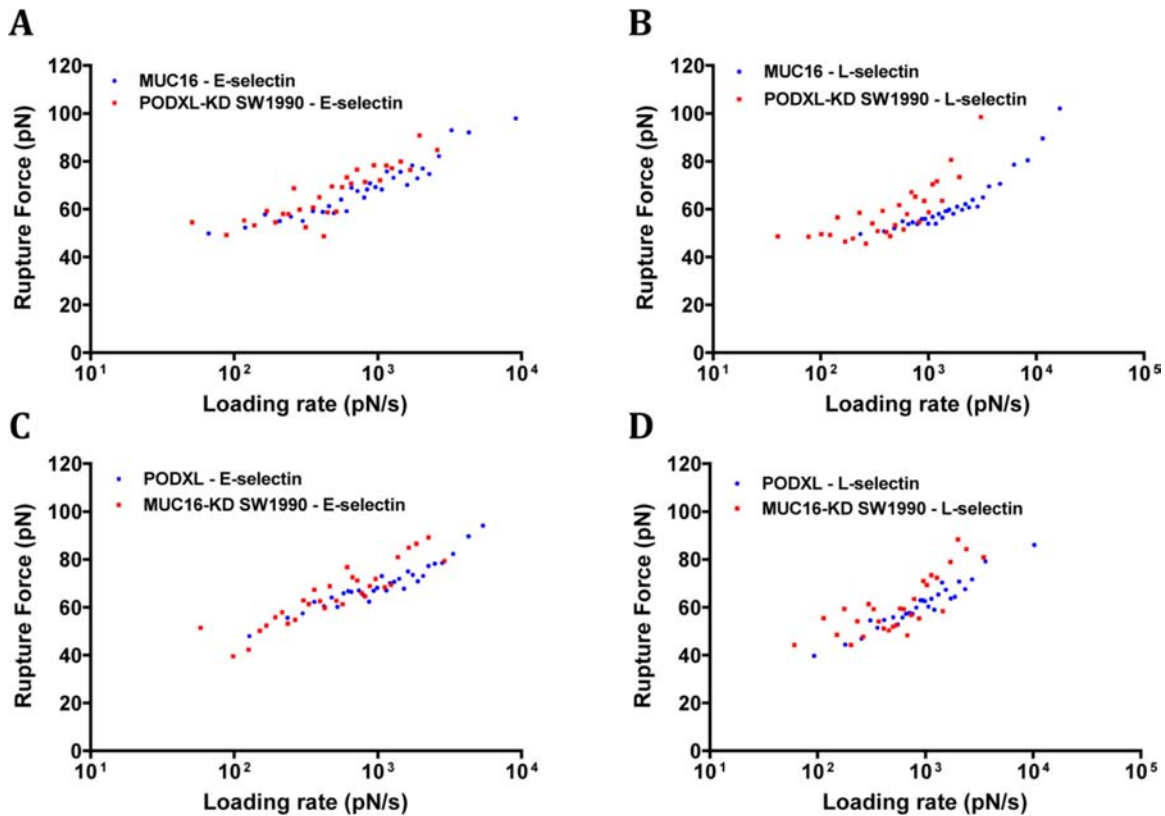

**Supplementary Figure S1: Micromechanical properties of MUC16 and PODXL binding to E-/L-selectin for both protein-protein and cell-protein systems.** Rupture force as a function of loading rate was measured for the interaction between E- or L-selectins and immunopurified MUC16 or PODXL as well as MUC16-expressing (PODXL-KD) or PODXL-expressing (MUC16-KD) SW1990 cells. Data represent the mean  $\pm$  S.E.M. of 3–4 independent experiments for each binding pair.

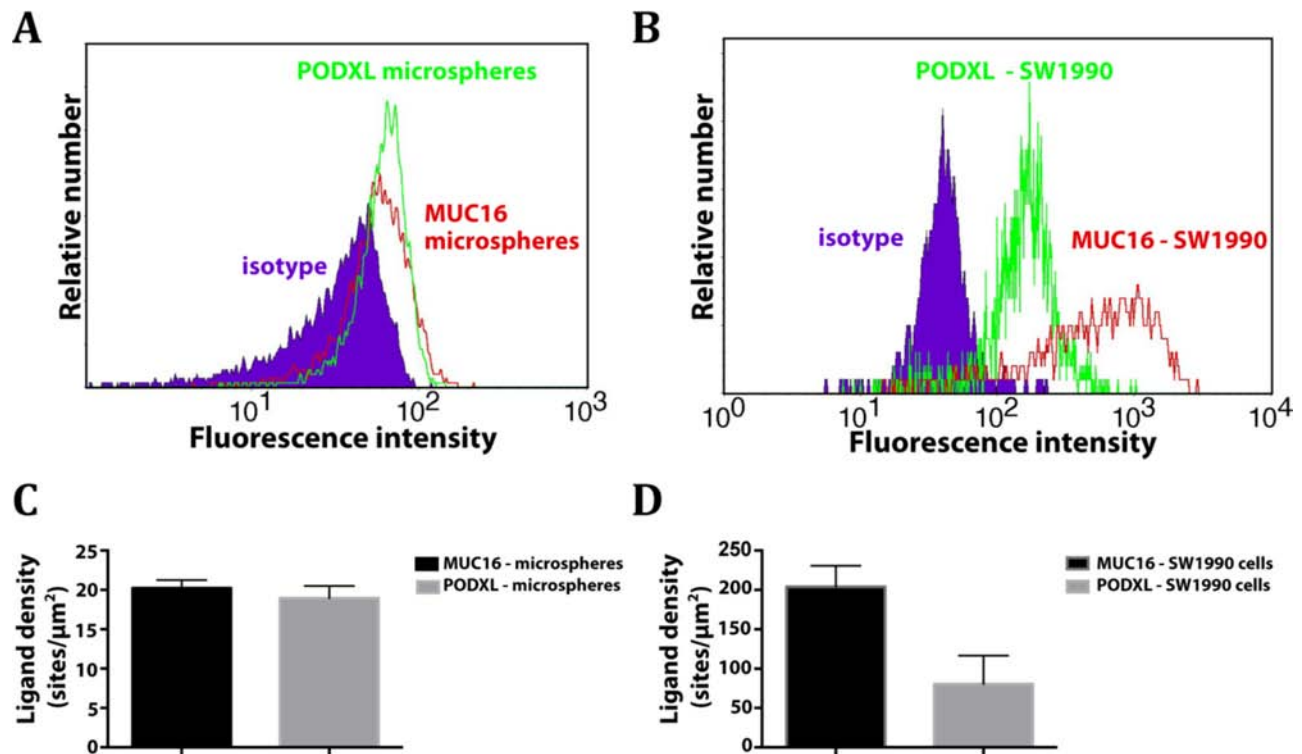

**Supplementary Figure S2: PODXL and MUC16 site density on microspheres and SW1990 cells as determined by quantitative flow cytometry.** Representative flow cytometric histograms of MUC16 and PODXL on **A**, protein-coated microspheres and **B**, SW1990 pancreatic cancer cells. Microspheres and SW1990 cells were stained by indirect single-color immunofluorescence using anti-PODXL or anti-MUC16 mAbs or their respective isotype control antibodies (purple). Using the Quantum FITC-5 MESF Kit in conjunction with Simply Cellular anti-mouse IgG microspheres (Bangs Laboratories, Fisher, IN), the site density of MUC16 and PODXL on **C**, protein-coated microspheres and **D**, SW1990 cells were calculated. Data represent the mean  $\pm$  S.E.M. of at least four independent experiments.

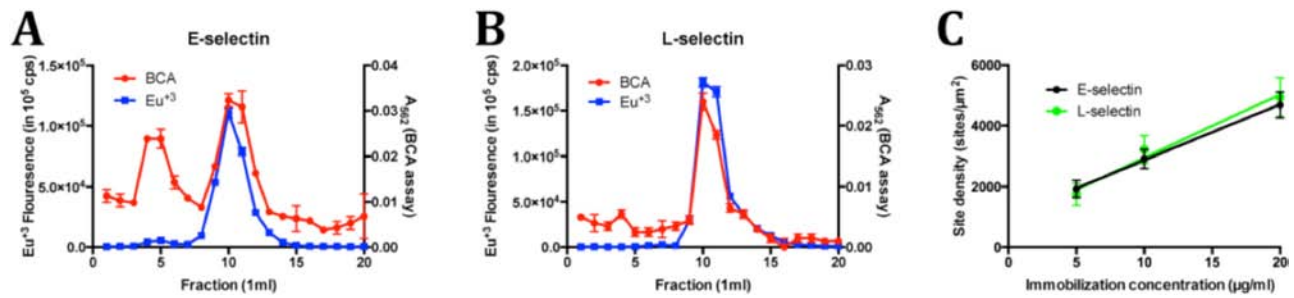

**Supplementary Figure S3: Determination of E- and L-selectin surface site density.** A. E-selectin or B. L-selectin was conjugated with europium (Eu<sup>3+</sup>) using the DELFIA Eu-Labeling Kit and purified via gel filtration chromatography. Elution fractions positive for both protein (absorbance at 562 nm following BCA assay) and Eu<sup>3+</sup> content (high time-resolved fluorescence in RFU) were pooled and concentrated. C. The purified europium-conjugated E- or L-selectin was used to determine the surface site density. Data represent the mean ± S.E.M. of at least four independent experiments.

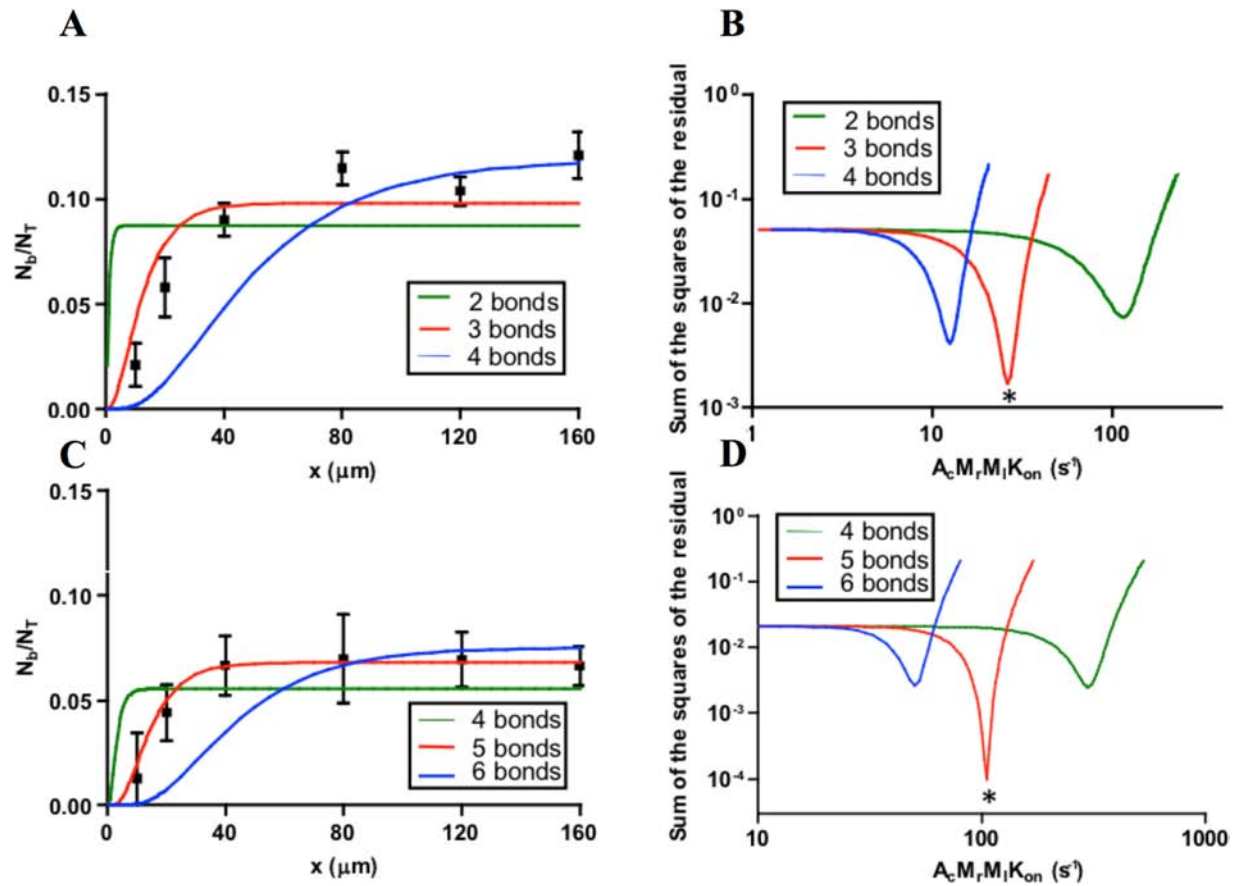

**Supplementary Figure S4: The multi-bond model determines the number of bonds and lumped affinity ( $A_c M_r M_l K_{on}$ ) needed to mediate PODXL-coated microsphere tethering on E-selectin in shear flow.** Fitting of the multi-bond model to experimental data for PODXL-coated microspheres interacting with 3000 sites/ $\mu\text{m}^2$  E-selectin at 0.5 dyn/cm<sup>2</sup> **A**, and at 1 dyn/cm<sup>2</sup> **C**. The sum of squares of residual **B** and **D**, was calculated by fitting the model to the experimental data shown in (**A**) and (**C**), respectively. The lumped binding affinity ( $A_c m_r m_l k_{on}$ ) for the optimal fit is marked by (\*) on (**B**) and (**D**).

**Supplementary Table S1.  $A_c M_r M_l K_{on}$  for MUC16- and PODXL- coated microspheres tethering on E-/L-selectin coated surface as predicted by the multi-bond model**

| Binding pair     | $A_c M_r M_l K_{on}$ ( $s^{-1}$ )   |       |       |
|------------------|-------------------------------------|-------|-------|
|                  | Shear stress (dyn/cm <sup>2</sup> ) |       |       |
|                  | 0.5                                 | 1     | 2     |
| MUC16-E-selectin | 10.1                                | 42.6  | 151.7 |
| MUC16-L-selectin | 16.1                                | 47.1  | 124.8 |
| PODXL-E-selectin | 26.3                                | 105.1 | 300.2 |
| PODXL-L-selectin | 8.6                                 | 38.1  | 115.7 |

The multi-bond model was fitted to the experimental data and optimized for both the number of bonds needed to achieve tethering and lumped affinity ( $A_c M_r M_l K_{on}$ ) for MUC16- and PODXL-coated microspheres tethering to 3000 sites/ $\mu\text{m}^2$  E- or L-selectin coated patches.

**Supplementary Table S2. Comparison of the binding parameters for ligand - E/L-selectin pairs**

| Binding pair                 | $k_{off}^{\circ}(s^{-1})$ | $x_{\beta}(nm)$ | Rupture force @1000 pN/s (pN) |
|------------------------------|---------------------------|-----------------|-------------------------------|
| MUC16-E-selectin             | $0.26 \pm 0.08$           | $0.34 \pm 0.02$ | 71                            |
| PODXL-E-selectin             | $0.33 \pm 0.05$           | $0.33 \pm 0.01$ | 69                            |
| PMN (PSGL-1)-E-selectin*     | $0.31 \pm 0.06$           | $0.12 \pm 0.01$ | 156                           |
| sLeX-E-selectin <sup>§</sup> | 0.30                      | 0.5             | 48                            |
| MUC16-L-selectin             | $0.82 \pm 0.04$           | $0.36 \pm 0.01$ | 56                            |
| PODXL-L-selectin             | $0.49 \pm 0.04$           | $0.35 \pm 0.02$ | 62                            |
| PMN (PSGL-1)-L-selectin*     | $0.85 \pm 0.10$           | $0.17 \pm 0.01$ | 93                            |
| sLeX-L-selectin <sup>§</sup> | 6                         | 0.45            | 29                            |

\*Data presented from Hanley *et al.* [42] with Bell model kinetic constants for linear region (100–10,000 pN/s) and rupture forces estimated from provided figures.

<sup>§</sup>Data presented from Zhang *et al.* [43] with Bell model kinetic constants for linear region (100–10,000 pN/s) and rupture forces estimated from provided figures. Where appropriate, data shown as the mean  $\pm$  S.D.
